# Supplementary material for: Epistatic interactions between mutations of TACI (TNFRSF13B) and TCF3 result in a severe primary immunodeficiency disorder and systemic lupus erythematosus
Source: PubMed Central journal article supplement (PMC5671988; doi:10.1038/cti.2017.41), 2017-10-20

SUPPLEMENTARY FIGURE 1

A

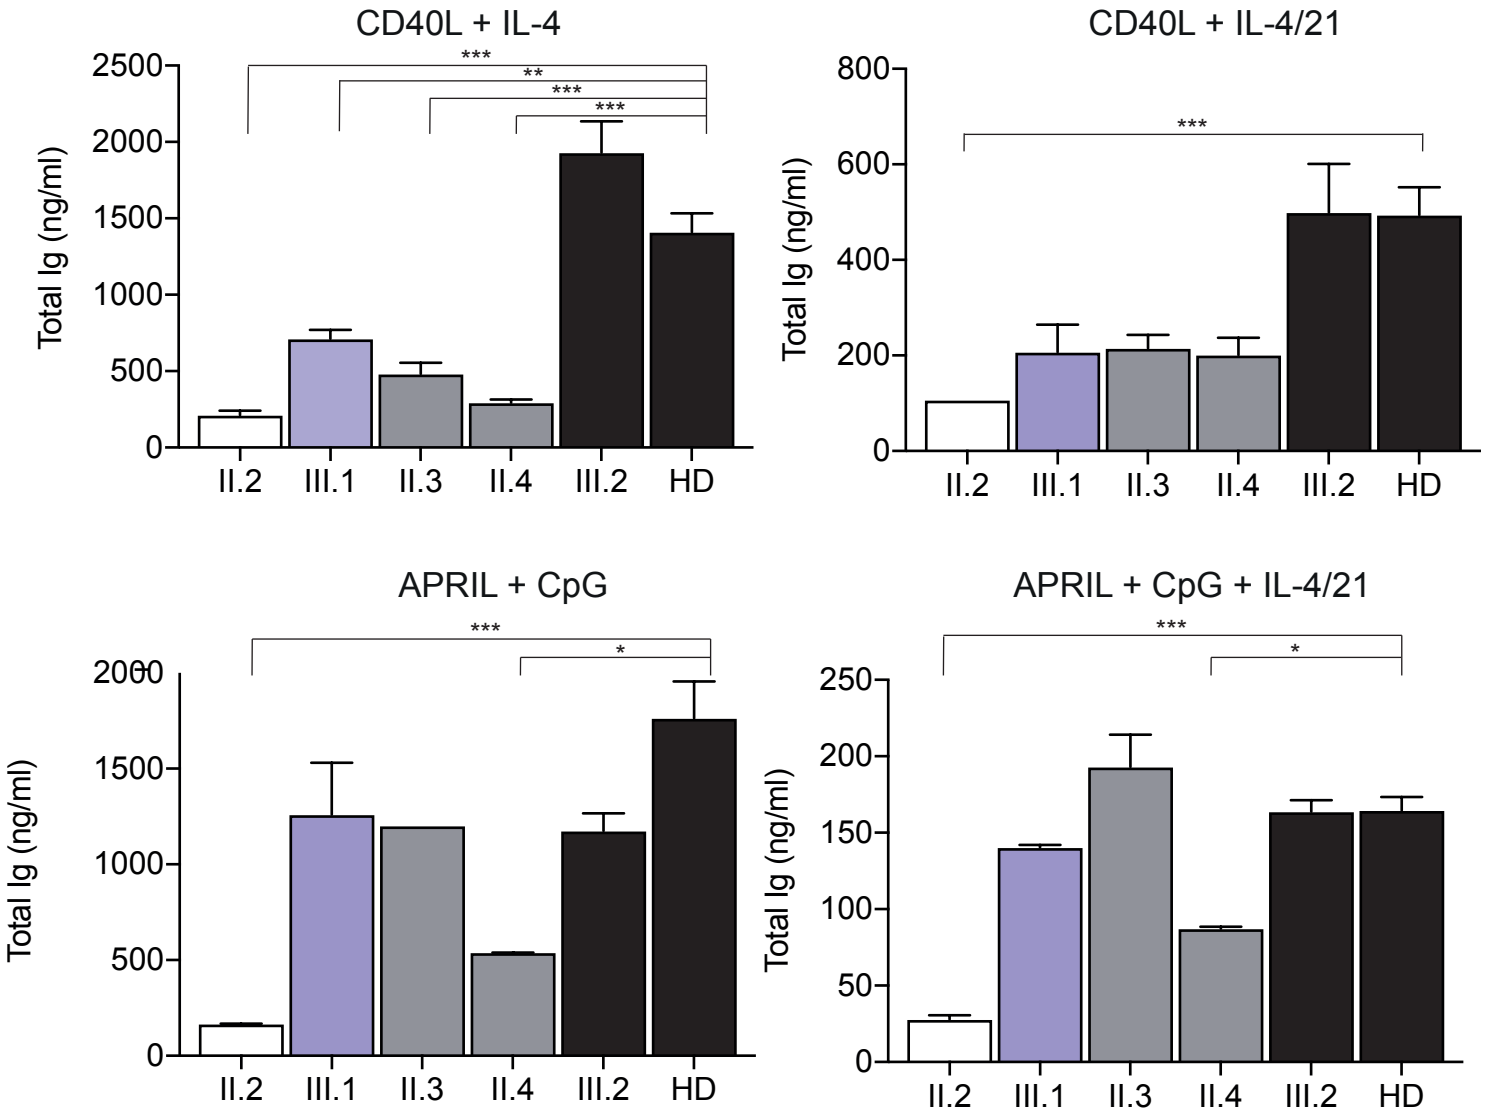

Supplement: cti201741x1.pdf [file cti201741x1.pdf]
