# Supplementary material for: Epistatic interactions between mutations of TACI (TNFRSF13B) and TCF3 result in a severe primary immunodeficiency disorder and systemic lupus erythematosus
Source: PubMed Central journal article supplement (PMC5671988; doi:10.1038/cti.2017.41), 2017-10-20
Supplement: cti201741x2.pdf [file cti201741x2.pdf]

### Supplementary Table 1: Variant filtration

|                                                                            |                            |        |    |         |         |
|----------------------------------------------------------------------------|----------------------------|--------|----|---------|---------|
| High-confidence variants discovered in family                              | 105,815 (63,994 on target) |        |    |         |         |
| Variant genotype shared II.2 and III.3                                     | 62,798 (37,977)            |        |    |         |         |
| Variant ALT allele <0.01 in global 'healthy' populations and rare in-house | 850 (524)                  |        |    |         |         |
| Variant likely to affect protein sequence                                  | 142 (139)                  |        |    |         |         |
| Genotype not shared with II.1 or III.2                                     | 94 (91)                    |        |    |         |         |
| Interpreted for causality under genetic model                              | DOM                        | CR+DOM | CR | HOM REC | DE NOVO |
|                                                                            | 77                         | 8      | 9  | 0       | 0       |
| Variants selected for family-wide genotyping                               | 9                          | 0      | 0  | 0       | 0       |
| Variants co-segregating with disease severity                              | 1                          | 0      | 0  | 0       | 0       |

DOM variant interpreted under dominant genetic model

CR+DOM variant interpreted under compound recessive and dominant genetic models

CR variant interpreted under compound recessive model

HOM REC variant interpreted under homozygous and hemizygous genetic models

DE NOVO variant interpreted under *de novo* genetic model

on-target site is directly targeted by the exome enrichment kit
