# Supplementary material for: Epistatic interactions between mutations of TACI (TNFRSF13B) and TCF3 result in a severe primary immunodeficiency disorder and systemic lupus erythematosus
Source: PubMed Central journal article supplement (PMC5671988; doi:10.1038/cti.2017.41), 2017-10-20
Supplement: cti201741x3.pdf [file cti201741x3.pdf]

**Supplementary Table 2: Characteristics of filtered variants**

| Chr | Pos (GRCh37.p13) | rs identifier | REF | ALT        | II.1 | II.2 | III.1 | III.2 | Gene      | Effect                | HGVS classification     | interpreted under genetic model | Selected for kindred-wide genotyping |
|-----|------------------|---------------|-----|------------|------|------|-------|-------|-----------|-----------------------|-------------------------|---------------------------------|--------------------------------------|
| 1   | 32,098,120       | rs144874149   | T   | C          | 0/0  | 0/1  | 0/1   | 0/0   | PEF1      | NON_SYNONYMOUS_CODING | p.Ile201Val/c.601T>C    | dominant                        |                                      |
| 1   | 38,019,657       | rs200160575   | G   | T          | 0/0  | 0/1  | 0/1   | 0/0   | SNIP1     | NON_SYNONYMOUS_CODING | p.Ser58Arg/c.174G>T     | dominant                        |                                      |
| 1   | 45,295,296       | rs139624405   | C   | T          | 0/0  | 0/1  | 0/1   | 0/0   | PTCH2     | NON_SYNONYMOUS_CODING | p.Arg358His/c.1073C>T   | dominant                        |                                      |
| 1   | 152,081,632      | rs2496251     | C   | G          | 0/0  | 0/1  | 0/1   | 0/0   | TCHH      | NON_SYNONYMOUS_CODING | p.Arg1354Pro/c.4061C>G  | dominant                        |                                      |
| 1   | 153,907,306      | .             | T   | TGCTGC,TGC | 0/0  | 2/2  | 0/2   | 0/2   | DENND4B   | FRAME_SHIFT           | p.X901X/c.2702*+>+GCTGC | compound recessive              |                                      |
| 1   | 160,011,262      | rs142596580   | T   | C          | 0/0  | 0/1  | 0/1   | 0/0   | KCNJ10    | NON_SYNONYMOUS_CODING | p.Lys354Arg/c.1061T>C   | dominant                        |                                      |
| 1   | 169,825,081      | rs140724273   | C   | T          | 0/0  | 0/1  | 0/1   | 0/0   | SCYL3     | NON_SYNONYMOUS_CODING | p.Val444Ile/c.1330C>T   | dominant                        |                                      |
| 1   | 203,316,842      | .             | T   | C          | 0/0  | 0/1  | 0/1   | 0/0   | FMOD      | NON_SYNONYMOUS_CODING | p.Asn186Ser/c.557T>C    | dominant                        |                                      |
| 1   | 205,649,537      | rs189035913   | G   | A          | 0/0  | 0/1  | 0/1   | 0/0   | SLC45A3   | START_GAINED          |                         | dominant                        |                                      |
| 1   | 227,307,541      | .             | G   | C          | 0/0  | 0/1  | 0/1   | 0/0   | CDC42BPA  | NON_SYNONYMOUS_CODING | p.Ile537Met/c.1611G>C   | dominant                        |                                      |
| 1   | 236,988,671      | rs201871910   | C   | T          | 0/0  | 0/1  | 0/1   | 0/0   | MTR       | NON_SYNONYMOUS_CODING | p.Thr300Met/c.899C>T    | dominant                        |                                      |
| 2   | 63,272,617       | .             | G   | C          | 0/0  | 0/1  | 0/1   | 0/0   | EHBP1     | NON_SYNONYMOUS_CODING | p.Glu1155Asp/c.3465G>C  | dominant                        |                                      |
| 2   | 107,040,309      | .             | C   | G          | 0/0  | 0/1  | 0/1   | 0/0   | RGPD3     | NON_SYNONYMOUS_CODING | p.Gly1372Arg/c.4114C>G  | dominant                        | YES                                  |
| 2   | 131,116,531      | rs150560639   | A   | G          | 0/0  | 0/1  | 0/1   | 0/0   | PTPN18    | NON_SYNONYMOUS_CODING | p.Tyr62Cys/c.185A>G     | dominant                        |                                      |
| 2   | 211,168,277      | rs181132123   | G   | A          | 0/0  | 0/1  | 0/1   | 0/0   | MYL1      | START_GAINED          |                         | dominant                        |                                      |
| 2   | 242,743,532      | rs150107870   | T   | C          | 0/0  | 0/1  | 0/1   | 0/0   | GAL3ST2   | NON_SYNONYMOUS_CODING | p.Leu383Pro/c.1148T>C   | dominant                        |                                      |
| 3   | 12,858,380       | rs201105764   | T   | A          | 0/0  | 0/1  | 0/1   | 0/1   | CAND2     | NON_SYNONYMOUS_CODING | p.Leu557Gln/c.1670T>A   | compound recessive              |                                      |
| 3   | 129,290,644      | rs150425885   | G   | C          | 0/0  | 0/1  | 0/1   | 0/0   | PLXND1    | NON_SYNONYMOUS_CODING | p.Leu1041Val/c.3121G>C  | dominant                        | YES                                  |
| 4   | 7,705,999        | rs201433688   | C   | T          | 0/0  | 0/1  | 0/1   | 0/1   | SORCS2    | NON_SYNONYMOUS_CODING | p.Thr447Met/c.1340C>T   | compound recessive              |                                      |
| 4   | 7,726,982        | rs201083224   | G   | A          | 0/0  | 0/1  | 0/1   | 0/1   | SORCS2    | NON_SYNONYMOUS_CODING | p.Val733Ile/c.2197G>A   | compound recessive              |                                      |
| 4   | 106,111,551      | .             | T   | C          | 0/0  | 0/1  | 0/1   | 0/0   | TET2      | START_GAINED          |                         | dominant                        | YES                                  |
| 4   | 121,961,159      | rs201745396   | G   | A          | 0/0  | 0/1  | 0/1   | 0/0   | NDNF      | NON_SYNONYMOUS_CODING | p.Thr80Met/c.239G>A     | dominant                        |                                      |
| 5   | 1,225,698        | .             | G   | T          | 0/0  | 0/1  | 0/1   | 0/0   | SLC6A18   | NON_SYNONYMOUS_CODING | p.Val36Leu/c.106G>T     | dominant                        |                                      |
| 5   | 5,463,856        | .             | C   | T          | 0/0  | 0/1  | 0/1   | 0/0   | ICE1      | NON_SYNONYMOUS_CODING | p.Ser1470Phe/c.4409C>T  | dominant                        | YES                                  |
| 5   | 11,384,801       | .             | G   | C          | 0/0  | 0/1  | 0/1   | 0/0   | CTNND2    | NON_SYNONYMOUS_CODING | p.Leu294Val/c.880G>C    | dominant                        |                                      |
| 5   | 148,406,624      | .             | C   | T          | 0/0  | 0/1  | 0/1   | 0/0   | SH3TC2    | NON_SYNONYMOUS_CODING | p.Ala438Thr/c.1312C>T   | dominant                        |                                      |
| 6   | 136,882,715      | rs41288957    | A   | T          | 0/0  | 0/1  | 0/1   | 0/1   | MAP3K5    | NON_SYNONYMOUS_CODING | p.Asp1315Asn/c.3943C>T  | compound recessive              |                                      |
| 6   | 159,104,008      | rs139839252   | A   | G          | 0/0  | 0/1  | 0/1   | 0/0   | SYTL3     | NON_SYNONYMOUS_CODING | p.Asn75Ser/c.20A>G      | dominant                        |                                      |
| 7   | 47,925,535       | rs76044743    | G   | A          | 0/0  | 0/1  | 0/1   | 0/0   | PKD1L1    | NON_SYNONYMOUS_CODING | p.Thr985Ile/c.2954G>A   | compound recessive and dominant |                                      |
| 7   | 73,249,125       | rs139220872   | G   | A          | 0/0  | 0/1  | 0/1   | 0/0   | WBSCR27   | NON_SYNONYMOUS_CODING | p.Pro229Leu/c.686G>A    | dominant                        |                                      |
| 7   | 100,420,010      | rs147563837   | G   | A          | 0/0  | 0/1  | 0/1   | 0/0   | EPHB4     | NON_SYNONYMOUS_CODING | p.Pro231Ser/c.691G>A    | dominant                        |                                      |
| 7   | 150,034,533      | rs61744057    | G   | A          | 0/0  | 0/1  | 0/1   | 0/0   | LRRG61    | NON_SYNONYMOUS_CODING | p.Glu195Lys/c.583G>A    | dominant                        |                                      |
| 8   | 103,291,407      | rs35794419    | A   | G          | 0/0  | 0/1  | 0/1   | 0/0   | UBR5      | NON_SYNONYMOUS_CODING | p.Ser2005Pro/c.6013A>G  | dominant                        |                                      |
| 9   | 4,117,933        | rs72687988    | C   | G          | 0/0  | 0/1  | 0/1   | 0/0   | GLIS3     | NON_SYNONYMOUS_CODING | p.Glu360Asp/c.1080C>G   | dominant                        |                                      |
| 9   | 6,981,115        | rs35049841    | G   | A          | 0/0  | 0/1  | 0/1   | 0/0   | KDM4C     | NON_SYNONYMOUS_CODING | p.Arg190Gln/c.569G>A    | dominant                        |                                      |
| 9   | 134,025,787      | .             | T   | C          | 0/0  | 0/1  | 0/1   | 0/0   | NUP214    | NON_SYNONYMOUS_CODING | p.Ile696Thr/c.2087T>C   | dominant                        |                                      |
| 9   | 134,322,541      | .             | C   | T          | 0/0  | 0/1  | 0/1   | 0/0   | PRRC2B    | NON_SYNONYMOUS_CODING | p.Arg309Cys/c.925C>T    | dominant                        |                                      |
| 9   | 139,837,138      | rs148935719   | G   | A          | 0/0  | 0/1  | 0/1   | 0/0   | FBXW5     | NON_SYNONYMOUS_CODING | p.Ala179Val/c.536G>A    | dominant                        |                                      |
| 9   | 79,584,179       | rs146507058   | C   | T          | 0/0  | 0/1  | 0/1   | 0/0   | DLG5      | NON_SYNONYMOUS_CODING | p.Arg782His/c.2345C>T   | dominant                        |                                      |
| 10  | 127,426,981      | .             | C   | G          | 0/0  | 0/1  | 0/1   | 0/0   | C10orf137 | NON_SYNONYMOUS_CODING | p.Leu616Val/c.1846C>G   | dominant                        |                                      |
| 11  | 6,580,282        | rs199875777   | C   | T          | 0/0  | 0/1  | 0/1   | 0/0   | DNHD1     | NON_SYNONYMOUS_CODING | p.Thr3121Ile/c.9362C>T  | dominant                        |                                      |
| 11  | 8,642,003        | rs150122555   | T   | C          | 0/0  | 0/1  | 0/1   | 0/0   | TRIM66    | NON_SYNONYMOUS_CODING | p.Tyr1045Cys/c.3134T>C  | compound recessive and dominant |                                      |
| 11  | 18,743,511       | rs200152516   | C   | T          | 0/0  | 0/1  | 0/1   | 0/0   | IGSF22    | NON_SYNONYMOUS_CODING | p.Gly63Ser/c.187C>T     | dominant                        |                                      |
| 12  | 48,723,318       | .             | G   | C          | 0/0  | 0/1  | 0/1   | 0/0   | H1FNT     | NON_SYNONYMOUS_CODING | p.Glu82Gln/c.244G>C     | compound recessive and dominant |                                      |
| 12  | 71,016,226       | rs111592755   | T   | C          | 0/0  | 0/1  | 0/1   | 0/0   | PTPRB     | NON_SYNONYMOUS_CODING | p.Thr217Ala/c.649T>C    | compound recessive and dominant |                                      |
| 12  | 72,070,803       | rs142758041   | A   | G          | 0/0  | 0/1  | 0/1   | 0/0   | THAP2     | NON_SYNONYMOUS_CODING | p.Glu201Gly/c.602A>G    | dominant                        |                                      |
| 12  | 92,818,706       | rs201506596   | T   | C          | 0/0  | 0/1  | 0/1   | 0/0   | CLLU1     | NON_SYNONYMOUS_CODING | p.Tyr84His/c.250T>C     | dominant                        | YES                                  |
| 12  | 94,613,883       | rs114758530   | A   | G          | 0/0  | 0/1  | 0/1   | 0/0   | PLXNC1    | NON_SYNONYMOUS_CODING | p.Lys549Arg/c.1646A>G   | dominant                        | YES                                  |
| 12  | 100,928,724      | rs189042762   | C   | T          | 0/0  | 0/1  | 0/1   | 0/0   | NR1H4     | NON_SYNONYMOUS_CODING | p.His168Tyr/c.502C>T    | dominant                        |                                      |
| 12  | 121,458,612      | .             | C   | T          | 0/0  | 0/1  | 0/1   | 0/0   | OASL      | NON_SYNONYMOUS_CODING | p.Glu433Lys/c.1297C>T   | dominant                        | YES                                  |
| 14  | 45,478,336       | .             | G   | A          | 0/0  | 0/1  | 0/1   | 0/0   | FAM179B   | NON_SYNONYMOUS_CODING | p.Gly1042Glu/c.3125G>A  | dominant                        |                                      |

|    |             |             |      |            |     |     |     |     |                |                                   |                              |                                 |
|----|-------------|-------------|------|------------|-----|-----|-----|-----|----------------|-----------------------------------|------------------------------|---------------------------------|
| 14 | 63,416,806  | rs41285522  | A    | G          | 0/0 | 0/1 | 0/1 | 0/0 | KCNH5          | NON_SYNONYMOUS_CODING             | p.Phe414Leu/c.1240A>G        | dominant                        |
| 14 | 102,027,868 | rs199500701 | G    | A          | 0/0 | 0/1 | 0/1 | 0/0 | DIO3           | NON_SYNONYMOUS_CODING             | p.Gly12Glu/c.35G>A           | dominant                        |
| 15 | 62,212,770  | rs139993005 | T    | C          | 0/0 | 0/1 | 0/1 | 0/0 | VPS13C         | NON_SYNONYMOUS_CODING             | p.His2337Arg/c.7010T>C       | dominant                        |
| 15 | 77,363,263  | rs111428129 | C    | T          | 0/0 | 0/1 | 0/1 | 0/0 | TSPAN3         | NON_SYNONYMOUS_CODING             | p.Val12Met/c.34C>T           | dominant                        |
| 15 | 79,296,192  | rs113161554 | C    | T          | 0/0 | 0/1 | 0/1 | 0/0 | RASGRF1        | NON_SYNONYMOUS_CODING             | p.Asp33Asn/c.97C>T           | dominant                        |
| 15 | 90,774,333  | .           | G    | C          | 0/0 | 0/1 | 0/1 | 0/0 | CIB1           | NON_SYNONYMOUS_CODING             | p.Ile153Met/c.459G>C         | dominant                        |
| 15 | 91,537,729  | .           | G    | A          | 0/0 | 0/1 | 0/1 | 0/0 | PRC1           | START_GAINED                      |                              | dominant                        |
| 17 | 40,172,150  | .           | T    | G          | 0/0 | 0/1 | 0/1 | 0/0 | NKIRAS2        | START_GAINED                      |                              | dominant                        |
| 17 | 40,452,271  | .           | G    | C          | 0/1 | 0/1 | 0/1 | 0/1 | STAT5A         | NON_SYNONYMOUS_CODING             | p.Glu133Gln/c.397G>C         | compound recessive              |
| 17 | 41,116,127  | rs140103494 | C    | T          | 0/0 | 0/1 | 0/1 | 0/0 | PTGES3L-AARSD1 | NON_SYNONYMOUS_CODING             | p.Gly139Glu/c.416C>T         | dominant                        |
| 17 | 61,972,766  | rs9909776   | A    | G          | 0/0 | 0/1 | 0/1 | 0/1 | CSH1           | NON_SYNONYMOUS_CODING             | p.Tyr175His/c.523A>G         | compound recessive              |
| 17 | 61,972,786  | rs61763998  | G    | T          | 0/0 | 0/1 | 0/1 | 0/1 | CSH1           | STOP_GAINED                       | p.Ser168*/c.503G>T           | compound recessive              |
| 17 | 72,889,676  | .           | G    | GGGCTCCGT/ | 1/2 | 1/1 | 1/1 | 1/2 | FADS6          | CODON_CHANGE_PLUS_CODON_INSERTION | p.Pro6X/c.17*->GGCTCCGTAGGTT | dominant                        |
| 18 | 44,584,608  | .           | T    | G          | 0/0 | 0/1 | 0/1 | 0/0 | KATNAL2        | NON_SYNONYMOUS_CODING             | p.Met112Arg/c.335T>G         | dominant                        |
| 18 | 45,566,448  | rs61738460  | C    | T          | 0/0 | 0/1 | 0/1 | 0/0 | ZBTB7C         | NON_SYNONYMOUS_CODING             | p.Gly344Glu/c.1031C>T        | dominant                        |
| 19 | 1,623,996   | .           | G    | GT         | 0/0 | 0/1 | 0/1 | 0/0 | TCF3           | FRAME_SHIFT                       | p.Thr168fsX191/c.349*->+T    | dominant                        |
| 19 | 1,827,020   | .           | TGGA | T,TGGAGGA  | 0/1 | 0/2 | 0/2 | 0/0 | REXO1          | CODON_CHANGE_PLUS_CODON_INSERTION | p.Ser588X/c.1764*->+GGA      | dominant                        |
| 19 | 1,923,176   | rs116369903 | C    | T          | 0/0 | 0/1 | 0/1 | 0/0 | SCAMP4         | NON_SYNONYMOUS_CODING             | p.Ala134Val/c.401C>T         | dominant                        |
| 19 | 6,832,126   | rs144739934 | G    | A          | 0/0 | 0/1 | 0/1 | 0/0 | VAV1           | NON_SYNONYMOUS_CODING             | p.Glu378Lys/c.1132G>A        | dominant                        |
| 19 | 16,799,084  | .           | G    | A          | 0/0 | 0/1 | 0/1 | 0/1 | TMEM38A        | NON_SYNONYMOUS_CODING             | p.Gly268Ser/c.802G>A         | compound recessive              |
| 19 | 35,422,772  | rs146842588 | G    | A          | 0/0 | 0/1 | 0/1 | 0/0 | ZNF30          | NON_SYNONYMOUS_CODING             | p.Gly12Glu/c.35G>A           | dominant                        |
| 19 | 36,297,671  | rs148996461 | G    | A          | 0/0 | 0/1 | 0/1 | 0/0 | PRODH2         | NON_SYNONYMOUS_CODING             | p.Ala323Val/c.968G>A         | dominant                        |
| 19 | 36,339,016  | rs146290709 | C    | T          | 0/0 | 0/1 | 0/1 | 0/0 | NPHS1          | NON_SYNONYMOUS_CODING             | p.Arg456Gln/c.1367C>T        | dominant                        |
| 19 | 38,965,975  | rs137933390 | A    | G          | 0/0 | 0/1 | 0/1 | 0/0 | RYR1           | NON_SYNONYMOUS_CODING             | p.Lys1393Arg/c.4178A>G       | dominant                        |
| 19 | 40,875,860  | .           | G    | A          | 0/0 | 0/1 | 0/1 | 0/0 | PLD3           | NON_SYNONYMOUS_CODING             | p.Val159Met/c.475G>A         | dominant                        |
| 19 | 43,373,084  | rs149977860 | T    | G          | 0/0 | 0/1 | 0/1 | 0/0 | PSG1           | NON_SYNONYMOUS_CODING             | p.Tyr178Ser/c.533T>G         | dominant                        |
| 19 | 43,411,250  | .           | G    | A          | 0/0 | 0/1 | 0/1 | 0/0 | PSG6           | NON_SYNONYMOUS_CODING             | p.Ala262Val/c.785G>A         | dominant                        |
| 19 | 43,690,539  | rs140275565 | G    | T          | 0/0 | 0/1 | 0/1 | 0/0 | PSG5           | NON_SYNONYMOUS_CODING             | p.Pro7Thr/c.19G>T            | dominant                        |
| 19 | 50,368,607  | .           | G    | A          | 0/0 | 0/1 | 0/1 | 0/0 | PNKP           | NON_SYNONYMOUS_CODING             | p.Thr92Ile/c.275G>A          | dominant                        |
| 19 | 50,789,791  | .           | G    | A          | 0/0 | 0/1 | 0/1 | 0/0 | MYH14          | NON_SYNONYMOUS_CODING             | p.Arg1490Gln/c.4469G>A       | compound recessive and dominant |
| 19 | 52,217,060  | rs150680444 | G    | A          | 0/0 | 0/1 | 0/1 | 0/0 | HAS1           | NON_SYNONYMOUS_CODING             | p.Arg452Trp/c.1354G>A        | compound recessive and dominant |
| 19 | 58,861,834  | .           | G    | C          | 0/0 | 0/1 | 0/1 | 0/0 | A18G           | NON_SYNONYMOUS_CODING             | p.Ser365Cys/c.1094G>C        | dominant                        |
| 19 | 58,980,635  | .           | G    | A          | 0/0 | 0/1 | 0/1 | 0/0 | ZNF324         | NON_SYNONYMOUS_CODING             | p.Arg28His/c.83G>A           | compound recessive and dominant |
| 20 | 30,496,398  | rs184016363 | G    | A          | 0/0 | 0/1 | 0/1 | 0/0 | TTL9           | NON_SYNONYMOUS_CODING             | p.Gly21Arg/c.61G>A           | dominant                        |
| 20 | 34,785,938  | rs144426436 | A    | G          | 0/0 | 0/1 | 0/1 | 0/0 | EPB41L1        | NON_SYNONYMOUS_CODING             | p.Lys439Arg/c.1316A>G        | dominant                        |
| 20 | 44,516,208  | rs143878961 | G    | T          | 0/0 | 0/1 | 0/1 | 0/0 | SPATA25        | NON_SYNONYMOUS_CODING             | p.Gln8Lys/c.22G>T            | dominant                        |
| 20 | 48,565,831  | rs41303809  | G    | A          | 0/0 | 0/1 | 0/1 | 0/0 | RNF114         | NON_SYNONYMOUS_CODING             | p.Arg187His/c.560G>A         | dominant                        |
| 20 | 62,203,597  | rs200635909 | T    | G          | 0/0 | 0/1 | 0/1 | 0/0 | HEL22          | NON_SYNONYMOUS_CODING             | p.Thr48Pro/c.142T>G          | dominant                        |
| 21 | 46,354,992  | .           | C    | G          | 0/0 | 0/1 | 0/1 | 0/0 | C21orf67       | NON_SYNONYMOUS_CODING             | p.Gly117Ala/c.350C>G         | dominant                        |
| 21 | 47,532,280  | .           | G    | T          | 0/0 | 0/1 | 0/1 | 0/0 | COL6A2         | NON_SYNONYMOUS_CODING             | p.Ser168Ile/c.503G>T         | dominant                        |
| 22 | 24,717,548  | rs56112030  | A    | T          | 0/0 | 0/1 | 0/1 | 0/0 | SPECC1L        | NON_SYNONYMOUS_CODING             | p.Leu139Phe/c.417A>T         | dominant                        |
| 22 | 25,024,108  | rs200266956 | G    | A          | 0/0 | 0/1 | 0/1 | 0/0 | GGT1           | NON_SYNONYMOUS_CODING             | p.Arg122Gln/c.365G>A         | compound recessive and dominant |
| 22 | 29,663,751  | rs11539373  | G    | A          | 0/0 | 0/1 | 0/1 | 0/0 | RHBDD3         | START_GAINED                      |                              | dominant                        |

YES

YES
